# Supplementary material for: Maxent estimation of aquatic Escherichia coli stream impairment
Source: PubMed Central journal article supplement (PMC6139247; doi:10.7717/peerj.5610), 2018-09-13
Supplement: peerj-06-5610-s001.pdf [file peerj-06-5610-s001.pdf]

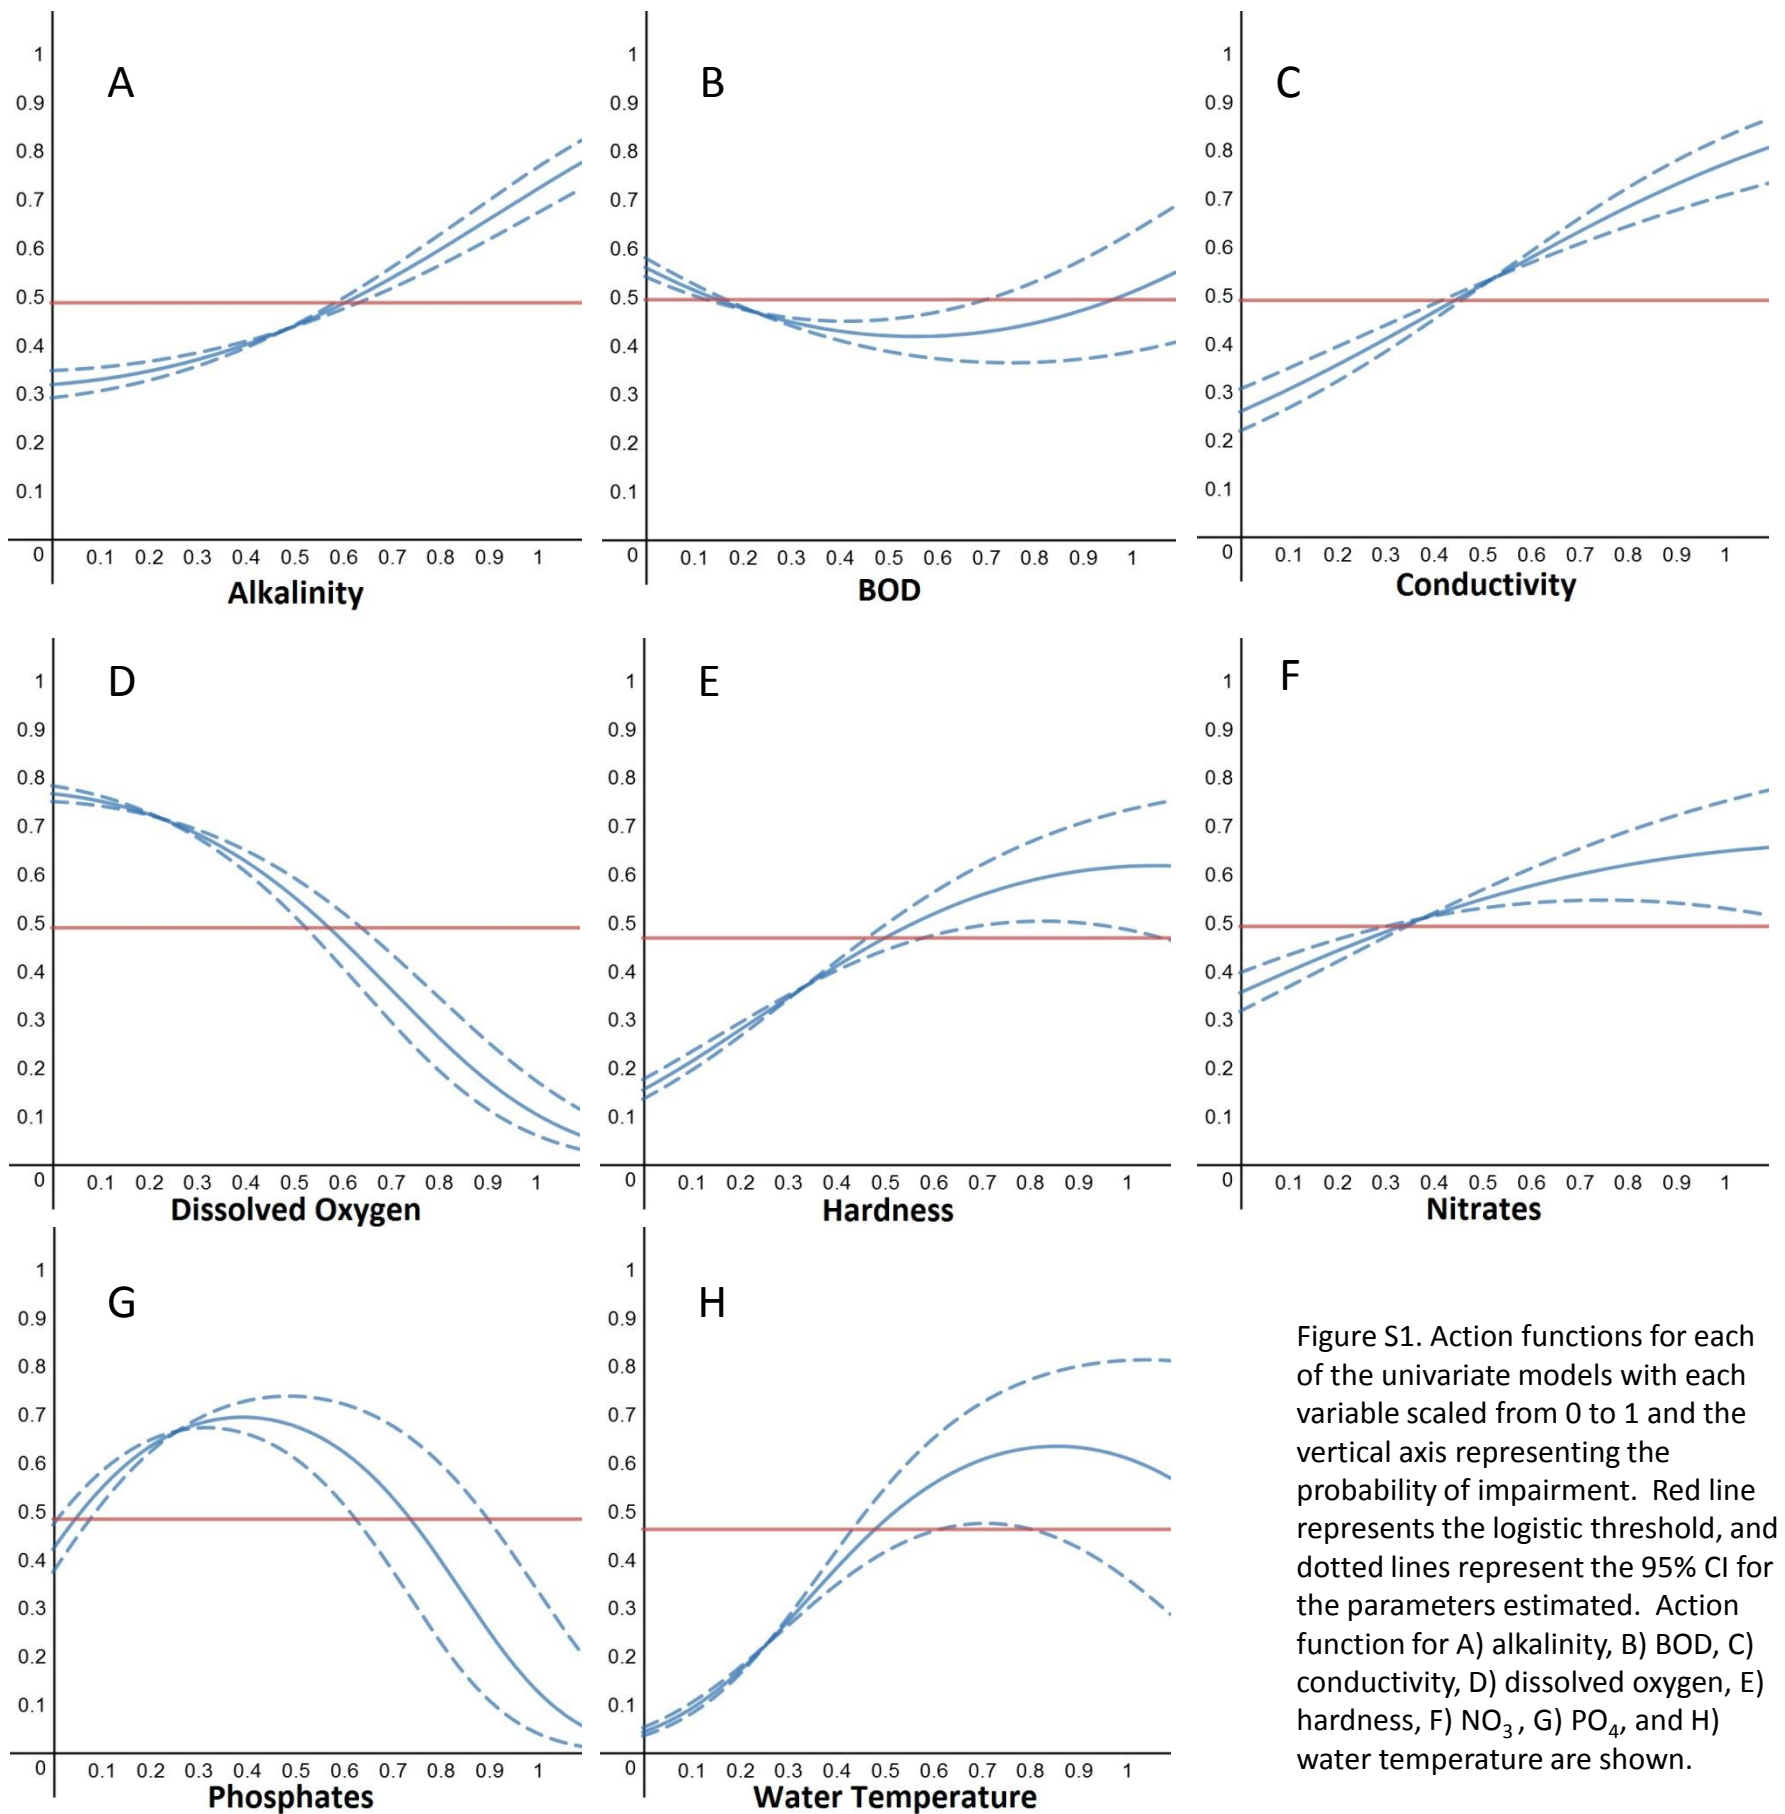

Figure S1. Action functions for each of the univariate models with each variable scaled from 0 to 1 and the vertical axis representing the probability of impairment. Red line represents the logistic threshold, and dotted lines represent the 95% CI for the parameters estimated. Action function for A) alkalinity, B) BOD, C) conductivity, D) dissolved oxygen, E) hardness, F)  $\text{NO}_3$ , G)  $\text{PO}_4$ , and H) water temperature are shown.
