# Supplementary material for: Maxent estimation of aquatic Escherichia coli stream impairment
Source: PubMed Central journal article supplement (PMC6139247; doi:10.7717/peerj.5610), 2018-09-13
Supplement: peerj-06-5610-s003.pdf [file peerj-06-5610-s003.pdf]

Table S1. Summary Statistics of data used in univariate and multivariate Maxent models of *Escherichia coli* impairment.

|                      | Mean   | SD     | Minimum | Maximum |
|----------------------|--------|--------|---------|---------|
| Alkalinity           | 99.62  | 52.25  | 4.00    | 210.00  |
| BOD                  | 1.66   | 1.42   | 0.02    | 6.43    |
| Conductivity         | 218.98 | 123.06 | 11.00   | 676.00  |
| Discharge            | 0.77   | 2.74   | 0.00    | 32.75   |
| Dissolved<br>Oxygen  | 10.19  | 1.96   | 0.79    | 15.90   |
| Hardness             | 126.15 | 57.03  | 7.30    | 256.70  |
| Nitrates             | 1.44   | 0.89   | 0.00    | 5.37    |
| pH                   | 7.56   | 0.45   | 5.25    | 8.74    |
| Phosphates           | 0.36   | 0.72   | 0.00    | 10.04   |
| Water<br>Temperature | 12.39  | 4.40   | 1.30    | 24.50   |
