# Supplementary material for: Maxent estimation of aquatic Escherichia coli stream impairment
Source: PubMed Central journal article supplement (PMC6139247; doi:10.7717/peerj.5610), 2018-09-13
Supplement: peerj-06-5610-s004.pdf [file peerj-06-5610-s004.pdf]

Table S2. Classification performance for all models run based on maximum test sensitivity and specificity as the logistic threshold (decision boundary)

| <b>Variables</b> | <b>Logistic Threshold</b> | <b>TN</b> | <b>FN</b> | <b>FP</b> | <b>TP</b> | <b><math>\chi^2</math></b> |
|------------------|---------------------------|-----------|-----------|-----------|-----------|----------------------------|
| Alk              | 0.488                     | 140       | 44        | 44        | 51        | 24.61                      |
| BOD              | 0.495                     | 110       | 36        | 74        | 59        | 12.04                      |
| Cond             | 0.490                     | 129       | 41        | 55        | 54        | 19.05                      |
| DO               | 0.493                     | 128       | 34        | 56        | 61        | 29.30                      |
| Flow             | 0.482                     | 155       | 72        | 29        | 23        | 2.86                       |
| Hardness         | 0.469                     | 102       | 30        | 82        | 65        | 14.34                      |
| Nitrates         | 0.493                     | 134       | 52        | 50        | 43        | 9.16                       |
| pH               | 0.491                     | 104       | 44        | 80        | 51        | 2.63                       |
| Phosphates       | 0.484                     | 138       | 55        | 46        | 40        | 8.54                       |
| Water Temp       | 0.463                     | 118       | 31        | 66        | 64        | 24.58                      |
| 8 variables      | 0.383                     | 144       | 20        | 40        | 75        | 82.94                      |
| 4 variables      | 0.424                     | 152       | 30        | 32        | 65        | 70.52                      |
| 5 variables      | 0.430                     | 151       | 29        | 33        | 66        | 71.26                      |
