# Supplementary material for: Maxent estimation of aquatic Escherichia coli stream impairment
Source: PubMed Central journal article supplement (PMC6139247; doi:10.7717/peerj.5610), 2018-09-13
Supplement: peerj-06-5610-s005.pdf [file peerj-06-5610-s005.pdf]

Table S3. Probability of Impairment and associated 95% confidence intervals for the total creek, each site, and each month that was sampled.

|               | 8-variable<br>Mean Probability<br>(95% CI) | 5-variable<br>Mean<br>Probability<br>(95% CI) | 4-variable<br>Mean Probability<br>(95% CI) |
|---------------|--------------------------------------------|-----------------------------------------------|--------------------------------------------|
| Sinking Creek | 0.338<br>(0.319, 0.358)                    | 0.353<br>(0.334, 0.373)                       | 0.359<br>(0.340, 0.378)                    |
| SC1           | 0.427<br>(0.343, 0.512)                    | 0.456<br>(0.379, 0.534)                       | 0.455<br>(0.376, 0.535)                    |
| SC2           | 0.434<br>(0.364, 0.503)                    | 0.453<br>(0.384, 0.522)                       | 0.456<br>(0.384, 0.527)                    |
| SC3           | 0.410<br>(0.334, 0.485)                    | 0.430<br>(0.355, 0.505)                       | 0.434<br>(0.359, 0.508)                    |
| SC4           | 0.409<br>(0.332, 0.486)                    | 0.418<br>(0.351, 0.508)                       | 0.430<br>(0.349, 0.510)                    |
| SC5           | 0.403<br>(0.337, 0.470)                    | 0.418<br>(0.353, 0.483)                       | 0.413<br>(0.348, 0.477)                    |
| SC6           | 0.373<br>(0.314,0.433)                     | 0.385<br>(0.326, 0.444)                       | 0.386<br>(0.327,0.445)                     |
| SC7           | 0.359<br>(0.295,0.423)                     | 0.372<br>(0.308, 0.435)                       | 0.371<br>(0.307, 0.434)                    |
| SC8           | 0.336<br>(0.269,0.403)                     | 0.351<br>(0.285, 0.418)                       | 0.360<br>(0.295, 0.425)                    |
| SC9           | 0.317<br>(0.242,0.391)                     | 0.331<br>(0.255, 0.406)                       | 0.343<br>(0.271, 0.416)                    |
| SC10          | 0.289<br>(0.232,0.347)                     | 0.305<br>(0.247, 0.364)                       | 0.315<br>(0.258, 0.372)                    |
| SC11          | 0.292<br>(0.221, 0.363)                    | 0.303<br>(0.233, 0.373)                       | 0.316<br>(0.249, 0.382)                    |
| SC12          | 0.276<br>(0.202, 0.350)                    | 0.288<br>(0.214, 0.362)                       | 0.303<br>(0.233, 0.374)                    |
| SC13          | 0.189<br>(0.140, 0.237)                    | 0.195<br>(0.146, 0.245)                       | 0.211<br>(0.167, 0.255)                    |
| SC14          | 0.176<br>(0.132, 0.221)                    | 0.184<br>(0.139, 0.230)                       | 0.187<br>(0.148, 0.226)                    |

|                 |                                       |                                       |                                       |
|-----------------|---------------------------------------|---------------------------------------|---------------------------------------|
| <b>February</b> | <b>0.225</b><br><b>(0.223, 0.228)</b> | <b>0.211</b><br><b>(0.209, 0.214)</b> | <b>0.191</b><br><b>(0.188, 0.194)</b> |
| <b>May</b>      | <b>0.353</b><br><b>(0.351, 0.356)</b> | <b>0.352</b><br><b>(0.349, 0.355)</b> | <b>0.344</b><br><b>(0.342, 0.347)</b> |
| <b>August</b>   | <b>0.535</b><br><b>(0.531, 0.538)</b> | <b>0.529</b><br><b>(0.526, 0.532)</b> | <b>0.511</b><br><b>(0.508, 0.514)</b> |
| <b>November</b> | <b>0.317</b><br><b>(0.312, 0.323)</b> | <b>0.315</b><br><b>(0.309, 0.321)</b> | <b>0.299</b><br><b>(0.294, 0.305)</b> |
